# Supplementary material for: Prevalence and treatment of atherogenic dyslipidemia in the primary prevention of cardiovascular disease in Europe: EURIKA, a cross-sectional observational study
Source: Springer Nature journal article supplement (doi:10.1186/s12872-017-0591-5), 2017-06-17
Supplement: MOESM2 [file 12451368]

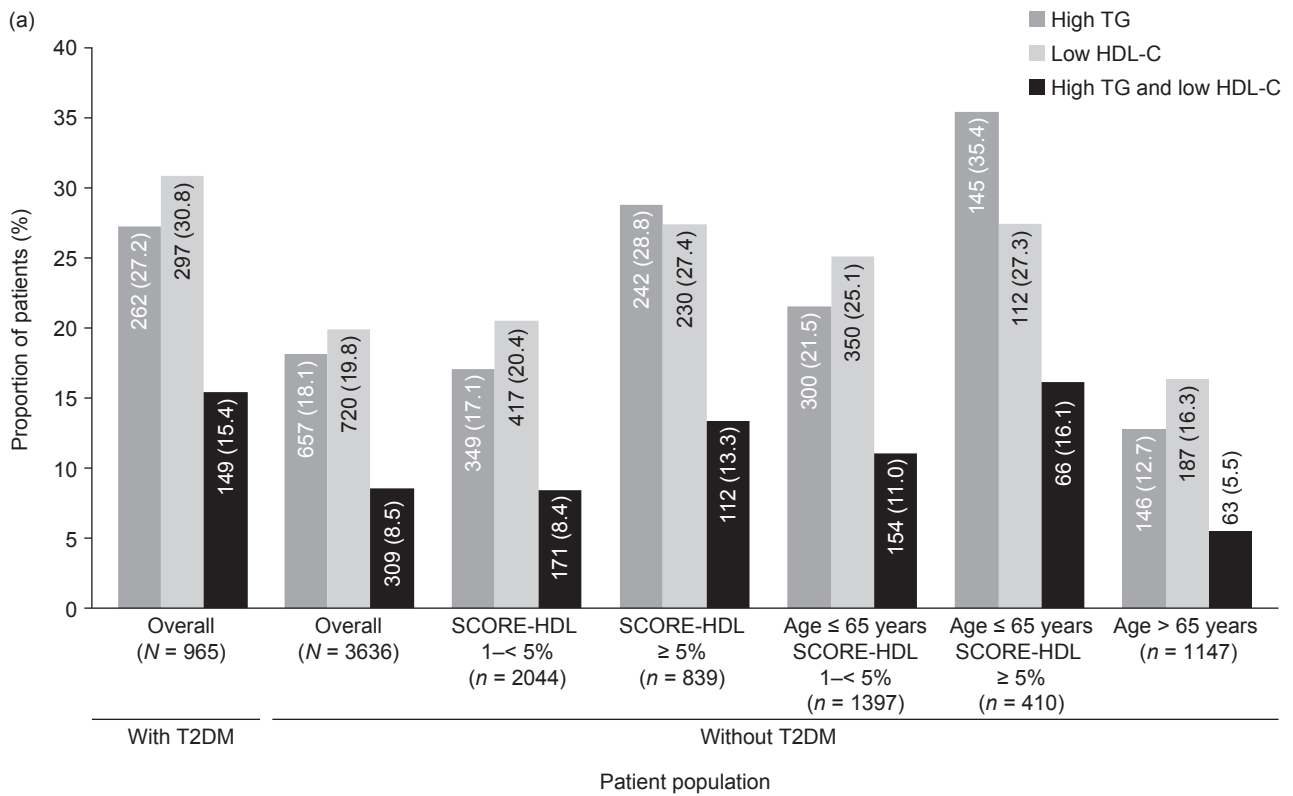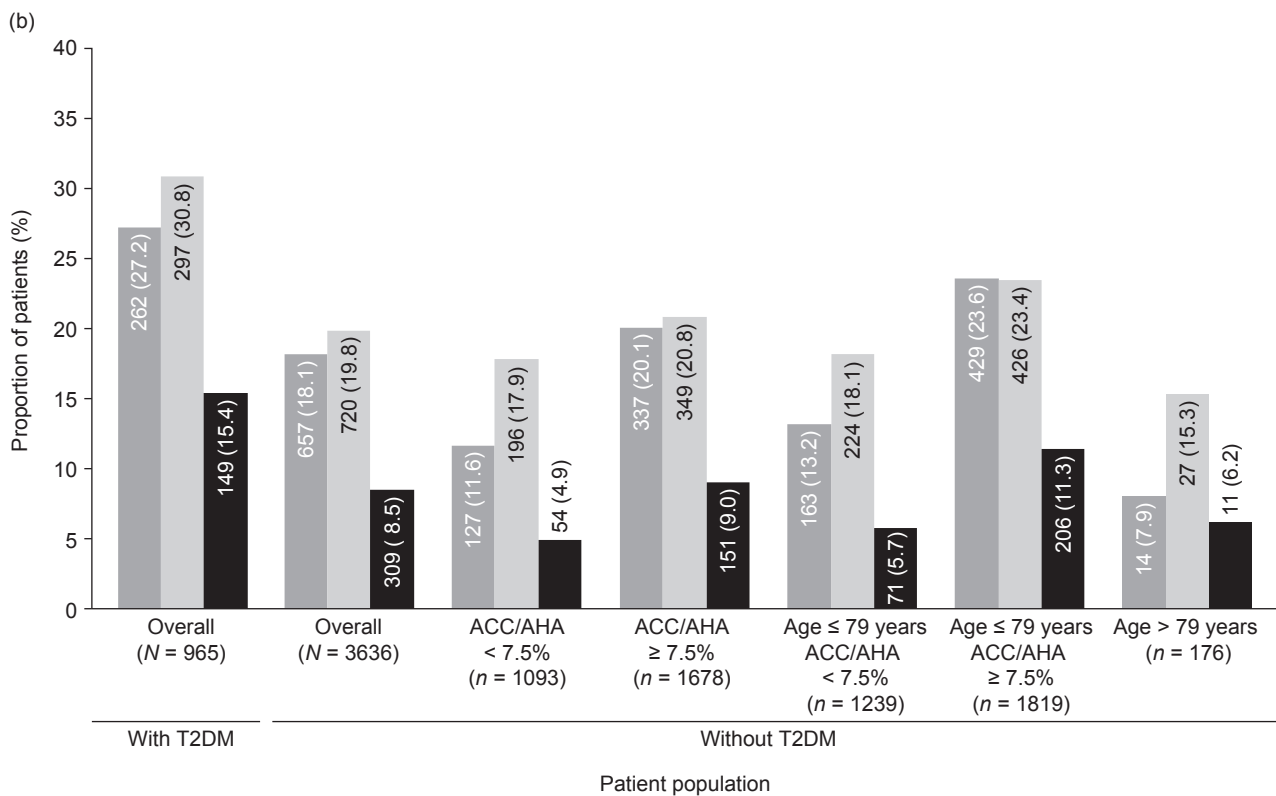

**Figure S1 Proportion of non-statin-treated patients with markers of atherogenic dyslipidemia, according to T2DM status, CVD risk, and age**

(a) According to SCORE-HDL categories; (b) According to ACC/AHA categories. Data within bars are n (%). High TG:  $\geq 2.3$  mmol/l. Low HDL-C:  $< 1.0$  mmol/l in men and  $< 1.3$  mmol/l in women. *Abbreviations:* ACC American College of Cardiology, AHA American Heart Association, CVD cardiovascular disease, HDL-C high-density lipoprotein cholesterol, SCORE-HDL Systematic Coronary Risk Evaluation-high-density lipoprotein, T2DM type 2 diabetes mellitus, TG triglycerides
